# Supplementary material
Source: HighWire-hosted journal article supplement (https://rapm.bmj.com/content/44/2/182)
Supplement: inline-supplementary-material-7 [file inline-supplementary-material-7.docx]

***Supplemental Table 5. Length of Stay: Generalized linear models for patients undergoing shoulder arthroplasty by race, median income quartile, and van Walraven score. Incidence Rate Ratio (95% CI).***

|  | White | Black | Hispanic | Other | Missing race | Median income: first quartile | Median income: second quartile | Median income: third quartile | Median income: fourth quartile | Median income: missing | Van Walraven tertile 1 | Van Walraven tertile 2 | Van Walraven tertile 3 |
| --- | --- | --- | --- | --- | --- | --- | --- | --- | --- | --- | --- | --- | --- |
| *Insurance payer* |  |  |  |  |  |  |  |  |  |  |  |  |  |
| Medicaid | 1.45*** | 1.05 | 1.48*** | 1.34*** | 1.48*** | 1.35*** | 1.39*** | 1.47*** | 1.47*** | 1.41*** | 1.43*** | 1.43*** | 1.43*** |
|  | (1.39,1.51) | (0.96,1.14) | (1.36,1.60) | (1.20,1.50) | (1.26,1.74) | (1.28,1.42) | (1.31,1.47) | (1.38,1.57) | (1.35,1.60) | (1.21,1.65) | (1.35,1.52) | (1.36,1.49) | (1.36,1.49) |
|  |  |  |  |  |  |  |  |  |  |  |  |  |  |
| Self-pay/no charge/uninsured | 1.40*** | 1.43** | 1.30** | 1.21 | 1.37* | 1.52*** | 1.32*** | 1.34*** | 1.37*** | 1.17 | 1.14* | 1.48*** | 1.48*** |
|  | (1.32,1.48) | (1.15,1.78) | (1.09,1.53) | (0.98,1.48) | (1.05,1.79) | (1.38,1.69) | (1.19,1.46) | (1.20,1.49) | (1.24,1.52) | (0.94,1.46) | (1.02,1.28) | (1.39,1.58) | (1.39,1.58) |
|  |  |  |  |  |  |  |  |  |  |  |  |  |  |
| Medicare/Other/Private Insurance (Reference) | 1.00 | 1.00 | 1.00 | 1.00 | 1.00 | 1.00 | 1.00 | 1.00 | 1.00 | 1.00 | 1.00 | 1.00 | 1.00 |
|  | (1.00,1.00) | (1.00,1.00) | (1.00,1.00) | (1.00,1.00) | (1.00,1.00) | (1.00,1.00) | (1.00,1.00) | (1.00,1.00) | (1.00,1.00) | (1.00,1.00) | (1.00,1.00) | (1.00,1.00) | (1.00,1.00) |
|  |  |  |  |  |  |  |  |  |  |  |  |  |  |
| N | 75921 | 3641 | 4993 | 2830 | 2075 | 17429 | 22612 | 23854 | 23891 | 1674 | 20235 | 44952 | 44952 |

* *p* < 0.05, ** *p* < 0.01, *** *p* < 0.001

*Incidence rate ratios, 95% confidence interval (CI)*

*All models adjusted for hospital state, year, procedure type, hospital procedure volume, and smoking status. Models also adjusted for race, median income quartile, and an ordinal recode of the van Walraven score, as appropriate.*
